# Supplementary material for: Climatic influence on anthrax suitability in warming northern latitudes
Source: PubMed Central journal article supplement (PMC6006314; doi:10.1038/s41598-018-27604-w), 2018-06-18

## Supplementary Information

Climatic influence on anthrax suitability in warming northern latitudes

Michael G. Walsh<sup>1,2</sup>, Allard W. de Smalen<sup>3</sup>, Siobhan M. Mor<sup>1,4</sup>

<sup>1</sup>The University of Sydney, Faculty of Medicine and Health, Marie Bashir Institute for Infectious Diseases and Biosecurity, Westmead, New South Wales, Australia <sup>2</sup>The University of Sydney, Faculty of Medicine and Health, Westmead Institute for Medical Research, Westmead, New South Wales, Australia, <sup>3</sup>The University of Sydney, Faculty of Medicine and Health, School of Public Health, Camperdown, New South Wales, Australia <sup>4</sup>The University of Sydney, Faculty of Science, School of Veterinary Science, Camperdown, New South Wales, Australia.

Supplementary Figure S1. The distribution of the climate and soil characteristics, pasture cover, livestock density, and wild ungulate species richness used in the modeling of the anthrax niche.

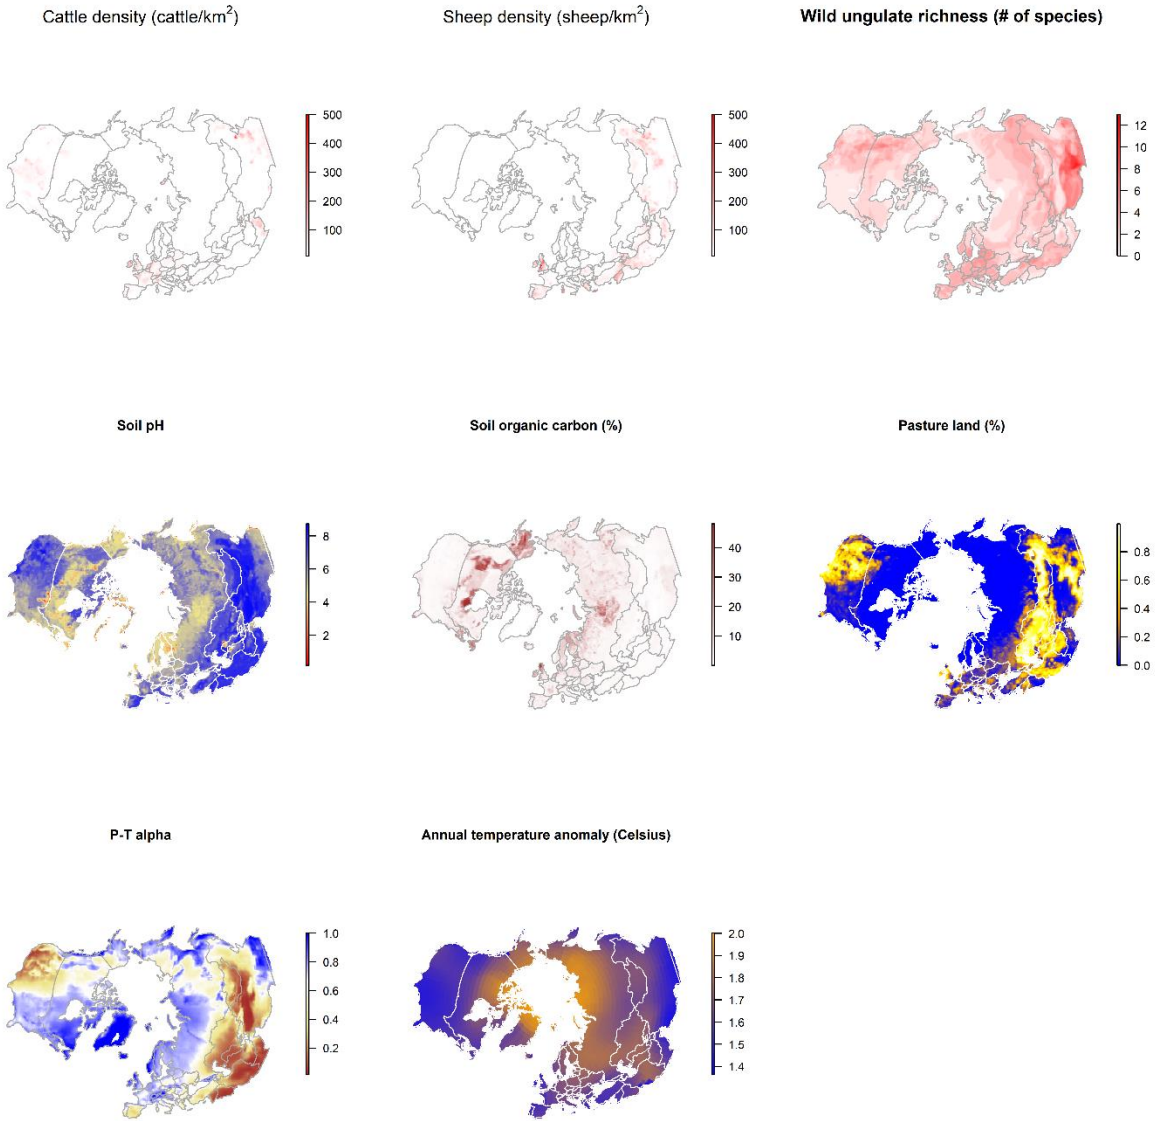

Supplementary Table S1. Model candidate evaluation comparing the full model with all covariates to reduced subset models. Comparisons are based on the Akaike information criterion (AIC) and the area under the receiver operating characteristic curve (AUC). The AUCs represent the mean from cross-validation.

| Models                                                                                  | AIC    | AUC (%) | AUC std. dev. |
|-----------------------------------------------------------------------------------------|--------|---------|---------------|
| Model 1: Full model - All covariates included                                           | 1161.6 | 74.8    | 0.040         |
| Model 2: Reduced - Livestock and ungulate species richness only included                | 1220.5 | 69.4    | 0.052         |
| Model 3: Reduced - Model 1 covariates excluding livestock density and ungulate richness | 1268.7 | 72.4    | 0.045         |
| Model 4: Reduced - Soil chemistry only (organic carbon + pH) included                   | 1298.0 | 68.4    | 0.058         |
| Model 5: Reduced - Climate only (temperature anomaly + PT- $\alpha$ ) included          | 1318.8 | 70.9    | 0.022         |
| Model 6: Reduced - Model 1 covariates excluding pasture cover                           | 1156.8 | 76.0    | 0.042         |

Supplementary Figure S2. Maxent model with the jackknife variable selection procedure comparing each covariate's lone contribution to the training gain (blue) to its effect on training gain when the covariate is withheld from the model (red).

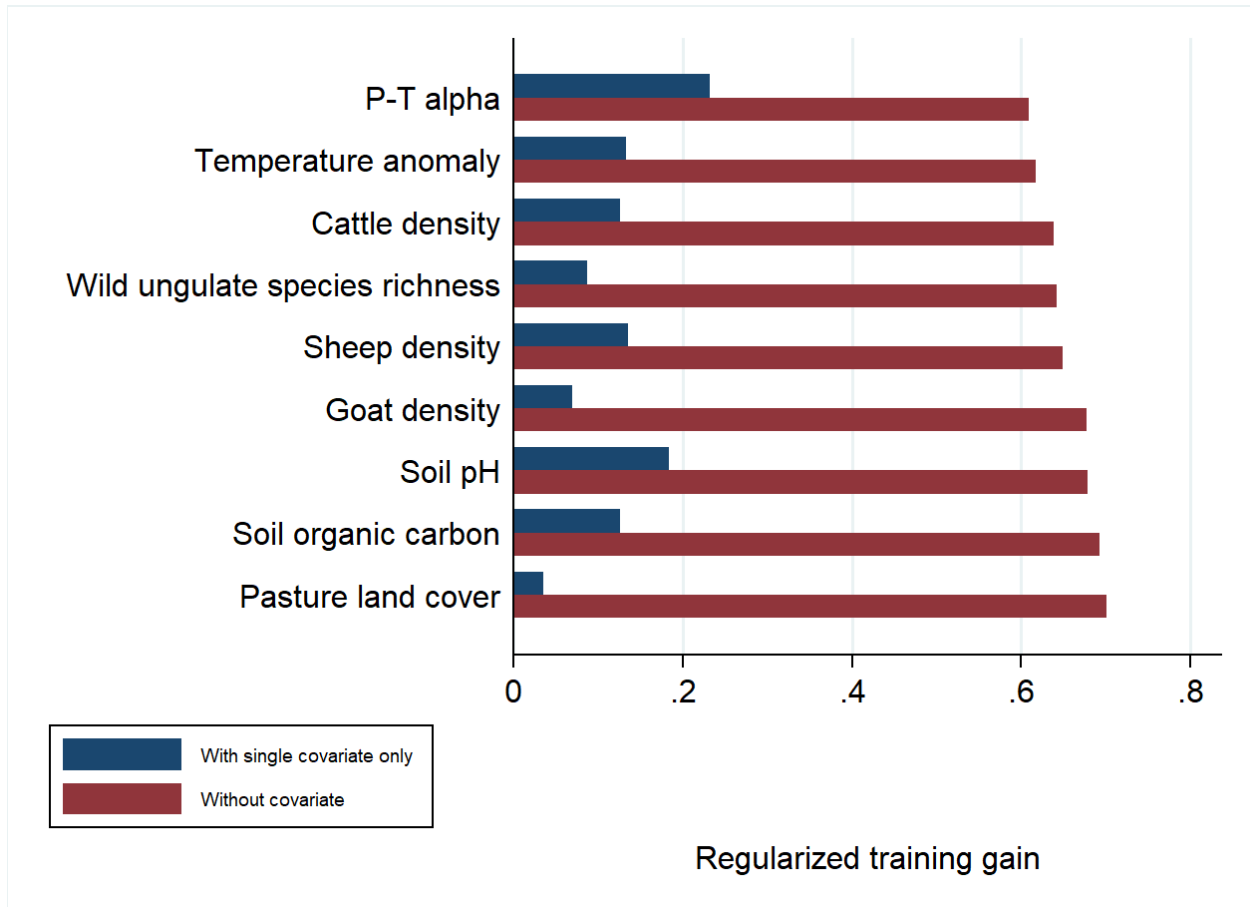

Supplementary Figure S3. Sensitivity analysis of anthrax landscape suitability evaluated at 1° resolution.

**Anthrax suitability (1 degree)**

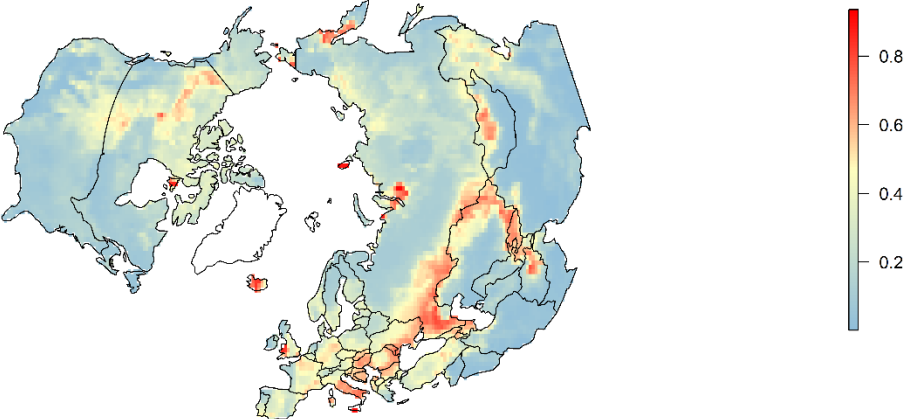

Supplementary Figure S4. Future anthrax landscape suitability based on climate projections at the 8.5 W m<sup>-2</sup> representative concentration pathway scenario.

**Anthrax suitability (2050 - RCP 8.5)**

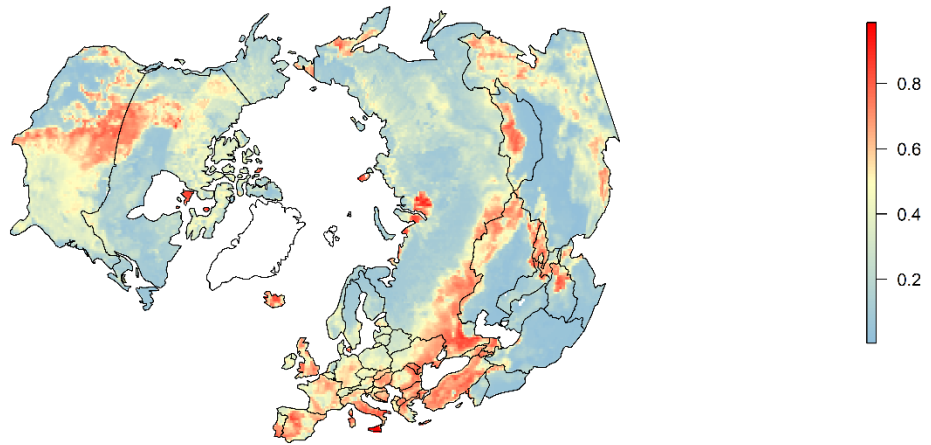

Supplement: 41598_2018_27604_MOESM1_ESM.pdf [file 41598_2018_27604_MOESM1_ESM.pdf]
